# Supplementary material for: Plant microRNAs in larval food regulate honeybee caste development
Source: PubMed Central journal article supplement (PMC5578494; doi:10.1371/journal.pgen.1006946), 2017-08-31
Supplement: pgen.1006946.s013.pdf [file pgen.1006946.s013.pdf]

**Table S1. Data for Illumina deep-sequencing of royal jelly, honey, pollen and beebread collected during *Brassica campestris* flowering stage.**

| Sequence               | Plant miRNAs | RJ   | Honey | Beebread | Pollen |
|------------------------|--------------|------|-------|----------|--------|
| UGACAGAAGAGAGUGAGCAC   | ath-miR156a  | 3990 | 32521 | 182464   | 673018 |
| UCCCAAUUGUAGACAAAGCA   | ath-miR158a  | 455  | 1547  | 115410   | 26982  |
| UCGCUUGGUGCAGGUCGGGAA  | ath-miR168a  | 126  | 4624  | 5046     | 23374  |
| UGAAGCUGCCAGCAUGAUCUA  | ath-miR167a  | 104  | 4137  | 6267     | 6602   |
| AGAAUCUUGAUGAUGCUGCAU  | ath-miR172a  | 60   | 1129  | 8296     | 5266   |
| UCGGACCAGGCUUCAUCCCC   | ath-miR165a  | 652  | 1231  | 10323    | 1872   |
| UCGGACCAGGCUUCAUCCCC   | ath-miR166a  | 926  | 1928  | 5758     | 1860   |
| UUGACAGAAGAUAGAGAGCAC  | ath-miR157a  | 613  | 585   | 726      | 1735   |
| UGACAGAAGAGAGAGACACA   | osa-miR156k  | 14   | 32    | 430      | 1711   |
| AGAAUCUUGAUGAUGCUGCAG  | ath-miR172c  | 17   | 483   | 1875     | 435    |
| UUAGAUUCACGCACAAACUCG  | ath-miR403   | 1    | 15    | 184      | 413    |
| UGCCUGGCUCCCUGUAUGCCA  | ath-miR160a  | 48   | 3884  | 7534     | 332    |
| CGGCUCUGAUACCAAUUGAUG  | ath-miR845a  | 5    | 60    | 775      | 233    |
| UGACAGAAGAUAGAGAGCAC   | ath-miR157d  | 17   | 34    | 5        | 214    |
| UAGACCAUUUGUGAGAAGGGA  | ath-miR824   | 4    | 121   | 782      | 205    |
| CGACAGAAGAGAGUGAGCAC   | ath-miR156g  | 9    | 28    | 53       | 138    |
| UCGGACCAGGCUUCAUCCUC   | osa-miR166g  | 213  | 165   | 218      | 134    |
| UCGAUAAACCUCUGCAUCCAG  | ath-miR162a  | 7    | 48    | 362      | 123    |
| GCAGCACCAUUAAGAUUCAC   | ath-miR172b* | 0    | 4     | 4        | 67     |
| UAUGAGAGUAUUUAAGUCAC   | ath-miR400   | 0    | 23    | 704      | 52     |
| UGAAGCUGCCAGCAUGAUCUG  | osa-miR167d  | 3    | 71    | 55       | 46     |
| UGACAGAAGAAAGAGAGCAC   | ath-miR156h  | 10   | 89    | 40       | 41     |
| AAGCUCAGGAGGGAUAGCGCC  | ath-miR390a  | 7    | 176   | 6        | 41     |
| UGAAGCUGCCAGCAUGAUCUGG | ath-miR167d  | 2    | 35    | 55       | 40     |
| UUCCACAGCUUUCUUGAACUG  | ath-miR396a  | 1    | 9     | 27       | 30     |
| UGACAACGAGAGAGAGCACGC  | osa-miR535   | 6    | 15    | 1        | 28     |
| UCGAACCAGGCUUCAUCCCC   | osa-miR166e  | 14   | 0     | 86       | 25     |
| CAGCCAAGGAUGACUUGCCGA  | ath-miR169a  | 1    | 3     | 27       | 24     |
| UCAUUGAGUGCAGCGUUGAUG  | ath-miR397a  | 2    | 92    | 169      | 16     |
| UCGGACCAGGCUUCAUCCCCU  | osa-miR166m  | 11   | 23    | 52       | 12     |
| UUGGCAUUCUGUCCACCUC    | ath-miR394a  | 0    | 4     | 16       | 12     |
| CCCAAUUGUAGACAAAGCA    | ath-miR158b  | 1    | 3     | 63       | 11     |
| UGCCUGGCUCCCUGUAUGCCG  | osa-miR160e  | 2    | 66    | 77       | 10     |
| UUUCGUUGUCUGUUCGACCUU  | ath-miR858   | 0    | 1     | 0        | 9      |
| CAGCCAAGGAUGACUUGCCGG  | ath-miR169b  | 0    | 6     | 3        | 7      |
| UCGCUUGGUGCAGAUCGGGAC  | osa-miR168a  | 38   | 162   | 1        | 6      |

|                          |               |   |     |    |   |
|--------------------------|---------------|---|-----|----|---|
| GGAAUCUUGAUGAUGCUGCAU    | ath-miR172e   | 1 | 9   | 38 | 5 |
| UGCCAAAGGAGAUUUGCCCGG    | ath-miR399f   | 3 | 80  | 36 | 5 |
| UAGCCAAGAAUGACUUGCCUA    | osa-miR169o   | 0 | 0   | 0  | 5 |
| UUAGAUGACCAUCAACAAACU    | ath-miR827    | 0 | 1   | 91 | 3 |
| UGGAAGGGGCAUGCAGAGGAG    | osa-miR528    | 0 | 723 | 0  | 2 |
| UGGAGAAGCAGGGCACGUGCG    | ath-miR164c   | 0 | 1   | 0  | 2 |
| UUGGACUGAAGGGAGCUCCUU    | ath-miR319c   | 0 | 0   | 0  | 2 |
| UUUUGUAUGUUGAAGGUGUAU    | ath-miR857    | 0 | 2   | 7  | 1 |
| UUGGACUGAAGGGAGCUCCCU    | ath-miR319a   | 0 | 1   | 5  | 1 |
| UUCCACAGCUUUCUUGAACUU    | ath-miR396b   | 0 | 0   | 3  | 1 |
| UGGAGAAGCAGGGCACGUGCA    | ath-miR164a   | 1 | 11  | 0  | 1 |
| GUCCUCGGGAUGCAGGAUUACC   | ath-miR2111a* | 0 | 4   | 0  | 1 |
| UAGCCAAGGAUGACUUGCCUG    | ath-miR169h   | 0 | 0   | 0  | 1 |
| UGAGCCAAGGAUGACUUGCCG    | ath-miR169d   | 0 | 3   | 1  | 1 |
| UAGCCAAGGAUGACUUGCCGG    | osa-miR169e   | 0 | 2   | 0  | 1 |
| AUGCACUGCCUCUUCCCUGGC    | ath-miR408    | 1 | 65  | 20 | 1 |
| CUGCACUGCCUCUUCCCUGGC    | osa-miR408    | 0 | 2   | 1  | 1 |
| UGCCAAAGGAGAUUUGCCCGG    | ath-miR399d   | 1 | 2   | 7  | 0 |
| UCAAUGCAUUGAAAGUGACUA    | ath-miR161.2  | 0 | 0   | 5  | 0 |
| UGUGUUCUCAGGUCACCCUG     | ath-miR398b   | 0 | 5   | 2  | 0 |
| UGAUUGAGCCGCGCCAAUAUC    | ath-miR171a   | 0 | 1   | 2  | 0 |
| UUAUUGAGUGCAGCGUUGAUG    | osa-miR397b   | 0 | 0   | 2  | 0 |
| CGACAGAAGAGAGUGAGCAUA    | osa-miR156l   | 1 | 0   | 2  | 0 |
| UCGGAUCAGGCUUCAUCCUC     | osa-miR166i   | 1 | 1   | 1  | 0 |
| UCAUUGAGUGCAUCGUUGAUG    | ath-miR397b   | 0 | 0   | 1  | 0 |
| UAGGAUUCAAUCCUUGCUGCU    | osa-miR1425   | 0 | 0   | 1  | 0 |
| UCCAAAGGGAUCGCAUUGAUCC   | ath-miR393a   | 0 | 1   | 1  | 0 |
| UCCAAAGGGAUCGCAUUGAUC    | osa-miR393    | 0 | 1   | 1  | 0 |
| UGAAUCUUGAUGAUGCUGCAC    | osa-miR172c   | 0 | 0   | 1  | 0 |
| UUGAGCCGUGCCAAUAUCACG    | ath-miR171c   | 0 | 0   | 1  | 0 |
| UGAUUGAGCCGUGCCAAUAUC    | osa-miR171b   | 0 | 0   | 1  | 0 |
| UGCCAAAGGAGAUUUGCCAG     | osa-miR399f   | 0 | 3   | 0  | 0 |
| UGCCAAAGGAGAUUUGCCUCG    | ath-miR399e   | 0 | 0   | 0  | 0 |
| UCGGACCAGGCUUCAUCCCU     | osa-miR166k   | 0 | 10  | 0  | 0 |
| UAAUCUGCAUCCUGAGGUUUA    | ath-miR2111a  | 0 | 7   | 0  | 0 |
| UUUGGAUUGAAGGGAGCUCUG    | osa-miR159a.1 | 1 | 6   | 0  | 0 |
| UUUGGAUUGAAGGGAGCUCUU    | ath-miR159b   | 0 | 4   | 0  | 0 |
| UUUGGAUUGAAGGGAGCUCUA    | ath-miR159a   | 0 | 4   | 0  | 0 |
| UUUGGAUUGAAGGGAGCUCCU    | ath-miR159c   | 0 | 4   | 0  | 0 |
| UCGGCCUCGUGGAUGGACCAG    | osa-miR820a   | 0 | 2   | 0  | 0 |
| UGCCAAAGGAGAGUUGCCUG     | ath-miR399b   | 0 | 1   | 0  | 0 |
| CGGUCUUGAGGCAGGAACUGAG   | osa-miR1861h  | 0 | 1   | 0  | 0 |
| UCAACAUGGUAUCAGAGCUGGAAG | osa-miR1873   | 0 | 1   | 0  | 0 |

|                          |                  |                 |                 |                 |                 |
|--------------------------|------------------|-----------------|-----------------|-----------------|-----------------|
| GUGUUUGGUUUAGGGAUGAGGUGG | osa-miR1879      | 0               | 1               | 0               | 0               |
| AGCUCUGAUACCAUGUUAGAUUAG | osa-miR1863      | 0               | 1               | 0               | 0               |
| UCCAAAGGGAUCGCAUUGAUCU   | osa-miR393b      | 0               | 1               | 0               | 0               |
| UGCAGUUGUUGUCUCAAGCUU    | osa-miR444b.2    | 0               | 1               | 0               | 0               |
| UGGAGAAGCAGGGCACGUGAG    | osa-miR164e      | 0               | 1               | 0               | 0               |
| AGCGCCAAGCGGUAGUUGUC     | osa-miR1423      | 0               | 1               | 0               | 0               |
| AUUGGAUUGAAGGGAGCUCCA    | osa-miR159c      | 0               | 0               | 0               | 0               |
| AUUGGAUUGAAGGGAGCUCCG    | osa-miR159d      | 0               | 0               | 0               | 0               |
| AUUGGAUUGAAGGGAGCUCCU    | osa-miR159e      | 0               | 0               | 0               | 0               |
| UGUGUUCUCAGGUCACCCCUU    | ath-miR398a      | 0               | 0               | 0               | 0               |
| AGGCAACUACACGUUGGGCGCUCG | osa-miR1423-5p.2 | 0               | 0               | 0               | 0               |
| CAACUACACGUUGGGCGCUCGA   | osa-miR1423b     | 0               | 0               | 0               | 0               |
| CUGAAGUGUUUGGGGGGACUC    | ath-miR395b      | 1               | 0               | 0               | 0               |
| UUCGCUUGCAGAGAGAAAUCAC   | ath-miR173       | 1               | 0               | 0               | 0               |
| Plant miRNA reads        |                  | 7371            | 54318           | 348124          | 745158          |
| total RNA reads          |                  | 10 <sup>7</sup> | 10 <sup>7</sup> | 10 <sup>7</sup> | 10 <sup>7</sup> |

| Sequence                  | Animal miRNAs | RJ  | Honey | Beebread | Pollen |
|---------------------------|---------------|-----|-------|----------|--------|
| UGAGGUAGUAGGUUGUAUAGUU    | cel-let-7     | 601 | 18    | 573      | 523    |
| UGGAAUGUAAAGAAGUAUGUA     | cel-miR-1     | 72  | 2     | 66       | 93     |
| UGAGGUAGUAGGUUGUAUAGU     | ame-let-7     | 68  | 15    | 58       | 63     |
| UGGAAUGUAAAGAAGUAUGGAG    | ame-miR-1     | 90  | 442   | 18       | 8      |
| UCAGGUACCUGAAGUAGCGCGCG   | ame-miR-275   | 852 | 84    | 1        | 5      |
| UGACUAGAUACAUCUCGUCU      | ame-miR-996   | 9   | 2     | 0        | 4      |
| UUGGUCCCCUUCACCAGCUGU     | ame-miR-133   | 7   | 0     | 6        | 3      |
| UAGGAACUUCAUACCGUGCUCU    | ame-miR-276   | 41  | 40    | 5        | 3      |
| UGGACGGAGAACUGAUAAAGGGC   | ame-miR-184   | 228 | 74    | 0        | 2      |
| ACCCUGUAGAUCGAAUUUGU      | ame-miR-10    | 5   | 0     | 2        | 2      |
| ACCCUGUAGAUCGAAUUUGUU     | dme-miR-10-5p | 5   | 0     | 2        | 2      |
| UCCCUGAGACCCUAAUUGUGA     | dme-miR-125   | 1   | 1     | 2        | 1      |
| UAAUACUGUCAGGUAAAGAUGUC   | ame-miR-8     | 35  | 20    | 0        | 1      |
| UAAGGCACGCGGUGAAUGCCAAG   | ame-miR-124   | 3   | 5     | 0        | 1      |
| UGGCAGUGUGGUUAGCUGGUUGUG  | dme-miR-34    | 0   | 0     | 0        | 1      |
| GGCAAGAUGUCGGCAUAGCUGA    | ame-miR-31a   | 53  | 30    | 1        | 0      |
| UAUCACAGCCAUUUUUGACGAUU   | ame-miR-13b   | 0   | 4     | 1        | 0      |
| GUGAGCAAAGUUUCAGGUGU      | ame-miR-87    | 7   | 8     | 1        | 0      |
| GUGAGCAAAGUUUCAGGUGUGC    | cel-miR-87    | 0   | 0     | 1        | 0      |
| UGAACACAGCUGGUGGUAUCUCAGU | ame-miR-317   | 28  | 28    | 0        | 0      |
| AUAAGUACUAGUGCCGCAGGAG    | ame-miR-252   | 7   | 10    | 0        | 0      |
| UUGUGCGUGUGACAGCGGCUA     | ame-miR-210   | 0   | 8     | 0        | 0      |

|                          |               |                 |                 |                 |                 |
|--------------------------|---------------|-----------------|-----------------|-----------------|-----------------|
| AUUGCACUUGUCCCGGCCUAU    | ame-miR-92a   | 12              | 7               | 0               | 0               |
| UUUGUUCGUUCGGCUCGAGUUA   | ame-miR-375   | 25              | 6               | 0               | 0               |
| GUAAAUGGCACUGGAAGAAUUCAC | ame-miR-263   | 4               | 5               | 0               | 0               |
| GUUAAUGGCACUGGAAGAAUUCAC | dme-miR-263a  | 4               | 5               | 0               | 0               |
| UAUCACAGCCAGCUUUGAUGAGC  | ame-miR-2     | 14              | 5               | 0               | 0               |
| CUAAGUACUAGUGCCGCAGGAG   | dme-miR-252   | 1               | 3               | 0               | 0               |
| UCAGUCUUUUUCUCUCUCCUA    | ame-miR-14    | 14              | 2               | 0               | 0               |
| UGACUAGAUCACACUCAUUA     | ame-miR-279   | 6               | 2               | 0               | 0               |
| CAAAUUCGGUUCUAGAGAGUUU   | dme-miR-10-3p | 10              | 1               | 0               | 0               |
| UGAAAGACAUGGGUAGUGA      | ame-miR-71    | 7               | 1               | 0               | 0               |
| UGGCAGUGUUGUAGCUGGUUG    | ame-miR-34    | 3               | 1               | 0               | 0               |
| CAGCGAGGUUAGAGUCCUACG    | dme-miR-276*  | 2               | 1               | 0               | 0               |
| UGAGAUCAUUGUGAAAGCUGAUU  | ame-bantam    | 1               | 1               | 0               | 0               |
| UAAAGCUAGAUUACCAAAGCA    | ame-miR-79    | 1               | 1               | 0               | 0               |
| GAAGCUCGUCUCUACAGGUAUCU  | ame-miR-993   | 18              | 1               | 0               | 0               |
| AAUUGCACCCGUCCCGGCCUGA   | ame-miR-92b   | 4               | 1               | 0               | 0               |
| CCCCUGAGACCCUAAUUGUGA    | ame-miR-125   | 1               | 1               | 0               | 0               |
| UGAGUAUUACAUCAGGUACUGGU  | ame-miR-12    | 1               | 1               | 0               | 0               |
| UAAGGCACGCGGUGAAUGCCA    | cel-miR-124   | 1               | 1               | 0               | 0               |
| UGGCAAGAUGUCGGCAUAGCUGA  | dme-miR-31a   | 1               | 1               | 0               | 0               |
| UGAGAUCGUUCAGUACGGCAAU   | cel-miR-58    | 0               | 1               | 0               | 0               |
| UGAGGUAGGCUCAGUAGAUGCGA  | cel-miR-48    | 0               | 1               | 0               | 0               |
| UAAAGCUAGAUUACCAAAGCAU   | dme-miR-79    | 1               | 0               | 0               | 0               |
| AAAUAUCAGCUGGUAUUCU      | ame-miR-283   | 0               | 0               | 0               | 0               |
| CAUUGCACUUGUCCCGGCCUAU   | dme-miR-92a   | 0               | 0               | 0               | 0               |
| UGAACACAGCUGGUGGUAUCCAGU | dme-miR-317   | 0               | 0               | 0               | 0               |
| UAAAUAUCAGCUGGUAUUCU     | dme-miR-283   | 0               | 0               | 0               | 0               |
| UAUCACAGCCAGCUUUGAUGUGC  | cel-miR-2     | 0               | 0               | 0               | 0               |
| UAUCACAGCCAGCUUUGAUGGGC  | dme-miR-2c    | 0               | 0               | 0               | 0               |
| AACCCGUAGAUCGAAUUGUG     | ame-miR-100   | 3               | 0               | 0               | 0               |
| UCUUUGGUUAUCUAGCUGUAUGA  | ame-miR-9a    | 2               | 0               | 0               | 0               |
| UAAAUGCACUAUCUGGUACGACA  | ame-miR-277   | 1               | 0               | 0               | 0               |
| AUUGUACUUCAUCAGGUGCUCUG  | ame-miR-305   | 1               | 0               | 0               | 0               |
| UAUCACAGCCAUUUUGAUGAG    | ame-miR-13a   | 1               | 0               | 0               | 0               |
| AGAUAUGUUUGAUUUCUUGGUUGU | ame-miR-190   | 1               | 0               | 0               | 0               |
| AGAUAUGUUUGAUUUCUUGGUUG  | dme-miR-190   | 1               | 0               | 0               | 0               |
| Animal miRNA reads       |               | 2253            | 840             | 737             | 712             |
| total RNA reads          |               | 10 <sup>7</sup> | 10 <sup>7</sup> | 10 <sup>7</sup> | 10 <sup>7</sup> |
