# Supplementary material for: Plant microRNAs in larval food regulate honeybee caste development
Source: PubMed Central journal article supplement (PMC5578494; doi:10.1371/journal.pgen.1006946), 2017-08-31
Supplement: pgen.1006946.s014.pdf [file pgen.1006946.s014.pdf]

**Table S2. Data for Illumina deep-sequencing of royal jelly, honey, pollen and beebread collected during *Camellia japonica* flowering stage.**

| Sequence               | Plant miRNAs   | RJ  | Honey | Beebread | Pollen |
|------------------------|----------------|-----|-------|----------|--------|
| UCGGACCAGGCUUCAUUCCCC  | ath-miR166a-3p | 155 | 1586  | 25825    | 50041  |
| UCGGACCAGGCUUCAUUCCCU  | osa-miR166m    | 15  | 321   | 4064     | 9728   |
| UCGAUAAACCUCUGCAUCCAG  | ath-miR162a-3p | 2   | 2607  | 3516     | 4005   |
| UCGGACCAGGCUUCAUUCCUC  | osa-miR166h-3p | 17  | 247   | 922      | 1986   |
| UGACAGAAGAGAGUGAGCAC   | ath-miR156a-5p | 7   | 1187  | 808      | 907    |
| GUUCAAUAAAGCUGUGGGAAG  | ath-miR396a-3p | 0   | 46    | 269      | 869    |
| UUAGAUUCACGCACAAACUCG  | ath-miR403-3p  | 2   | 658   | 352      | 841    |
| UUCCACAGCUUUCUUGAACUU  | ath-miR396b-5p | 1   | 212   | 263      | 702    |
| UUCCACAGCUUUCUUGAACUG  | ath-miR396a-5p | 1   | 147   | 160      | 679    |
| UUGACAGAAGAUAGAGAGCAC  | ath-miR157a-5p | 0   | 75    | 85       | 585    |
| UGAAGCUGCCAGCAUGAUCUG  | osa-miR167d-5p | 0   | 61    | 627      | 492    |
| UCGCUUGGUGCAGGUCGGGAA  | ath-miR168a-5p | 0   | 93    | 299      | 391    |
| UCCACAGGCUUUCUUGAACUG  | osa-miR396e-5p | 6   | 1     | 781      | 384    |
| UCUCCACAGGCUUUCUUGAACU | osa-miR396f-5p | 6   | 0     | 781      | 383    |
| UCGGACCAGGCUUCAUCCCCC  | ath-miR165a-3p | 2   | 754   | 112      | 329    |
| UGAAGCUGCCAGCAUGAUCUGG | ath-miR167d    | 0   | 49    | 197      | 245    |
| GUUCAAUAAAGCUGUGGGAAG  | osa-miR396a-3p | 0   | 11    | 67       | 238    |
| CCCGCCUUGCAUCAACUGAAU  | ath-miR168a-3p | 0   | 36    | 85       | 157    |
| UGACAGAAGAUAGAGAGCAC   | ath-miR157d    | 0   | 7     | 3        | 110    |
| UUGGACUGAAGGGUGCUCUCC  | osa-miR319b    | 2   | 0     | 226      | 107    |
| GGAAUGUUGUCUGGCUCGAGG  | osa-miR166d-5p | 0   | 86    | 211      | 93     |
| UGCCUGGCUCUCCUGUAUGCCA | ath-miR160a-5p | 0   | 114   | 14       | 84     |
| UGAAGCUGCCAGCAUGAUCUA  | ath-miR167a-5p | 0   | 78    | 42       | 73     |
| UUGGACUGAAGGGAGCUCCCU  | ath-miR319a    | 6   | 43    | 20       | 67     |
| UCCACAGGCUUUCUUGAACGG  | osa-miR396d    | 2   | 0     | 90       | 61     |
| GCGUAUGAGGAGCCAUGCAUA  | ath-miR160a-3p | 0   | 2     | 16       | 34     |
| UCGAACCAGGCUUCAUUCCCC  | osa-miR166e-3p | 0   | 1     | 12       | 34     |
| GGAAUCUUGAUGAUGCUGCAU  | ath-miR172e-3p | 0   | 2     | 16       | 29     |
| UGCCUGGCUCUCCUGUAUGCCG | osa-miR160e-5p | 0   | 47    | 7        | 29     |
| UGACAGAAGAGAGAGAGCAC   | ath-miR156j    | 0   | 14    | 2        | 21     |
| UUGGACUGAAGGGAGCUCCUU  | ath-miR319c    | 28  | 34    | 4        | 21     |
| UGACAACGAGAGAGAGCACGC  | osa-miR535-5p  | 0   | 2     | 3        | 19     |
| AGAAUCUUGAUGAUGCUGCAU  | ath-miR172a    | 0   | 5     | 12       | 16     |
| GGAAUGUUGUCUGGCUCGGGG  | osa-miR166b-5p | 0   | 6     | 3        | 14     |
| UCGCUUGGUGCAGAUCGGGAC  | osa-miR168a-5p | 1   | 0     | 15       | 12     |
| UCGAUAAGCCUCUGCAUCCAG  | osa-miR162b    | 0   | 7     | 9        | 11     |

|                        |                  |    |      |    |    |
|------------------------|------------------|----|------|----|----|
| UGUGUUCUCAGGUCACCCCUU  | ath-miR398a-3p   | 0  | 0    | 5  | 10 |
| CUGAAGUGUUUGGGGGAACUC  | ath-miR395a      | 0  | 19   | 5  | 10 |
| AGAAUCUUGAUGAUGCUGCAG  | ath-miR172c      | 0  | 34   | 0  | 9  |
| GCUCACUUCUCUUUCUGUCAGC | osa-miR156f-3p   | 0  | 7    | 6  | 8  |
| CUGCACUGCCUCUUCCCUGGC  | osa-miR408-3p    | 0  | 2    | 41 | 8  |
| UUUGGAUUGAAGGGAGCUCUA  | ath-miR159a      | 3  | 43   | 2  | 7  |
| GAUCCCCGGAACGGCGCCA    | ath-miR8175      | 20 | 129  | 0  | 7  |
| CGGCUCUGAUACCAAUUGAUG  | ath-miR845a      | 11 | 927  | 5  | 7  |
| UGUGUUCUCAGGUCGCCCCUG  | osa-miR398b      | 0  | 4    | 5  | 7  |
| GCUCACUGCUCUAUCUGUCAGA | ath-miR156c-3p   | 0  | 11   | 3  | 7  |
| UUUGGAUUGAAGGGAGCUCCU  | ath-miR159c      | 0  | 7    | 0  | 6  |
| AUGCACUGCCUCUUCCCUGGC  | ath-miR408-3p    | 0  | 11   | 2  | 5  |
| UGCCUGGCUCCCUGAAUGCCA  | osa-miR160f-5p   | 0  | 0    | 3  | 5  |
| UUUGGAUUGAAGGGAGCUCUG  | osa-miR159b      | 1  | 12   | 3  | 5  |
| UCGGAUCAGGCUUCAUCCUC   | osa-miR166i-3p   | 0  | 0    | 1  | 4  |
| UGCAGUUGUUGCCUCAAGCUU  | osa-miR444f      | 0  | 0    | 4  | 4  |
| UUUGGAUUGAAGGGAGCUCUU  | ath-miR159b-3p   | 1  | 13   | 1  | 4  |
| GCUCACUGCUCUUUCUGUCAGA | ath-miR156a-3p   | 0  | 0    | 16 | 4  |
| UGCAGUUGUUGUCUCAAGCUU  | osa-miR444b.2    | 0  | 0    | 3  | 4  |
| ACUGAACUCAAUACUUGCUGC  | osa-miR5538      | 0  | 1    | 1  | 4  |
| UGGAAGGGGCAUGCAGAGGAG  | osa-miR528-5p    | 0  | 0    | 9  | 3  |
| GGAAUGUUGGCUGGCUCGAGG  | osa-miR166h-5p   | 0  | 1    | 3  | 3  |
| CGACAGAAGAGAGUGAGCAUA  | osa-miR156l-5p   | 0  | 1    | 3  | 3  |
| UGAGGAGGAACAUAUUUACUAG | osa-miR5523      | 0  | 0    | 1  | 2  |
| AUCAUGCGAUCUCUUUGGAUU  | ath-miR393b-3p   | 0  | 0    | 26 | 2  |
| UGGAGGCAGCGGUUCAUCGAUC | ath-miR162a-5p   | 0  | 2    | 2  | 2  |
| UGAUUGAGCCGCGCCAAUAUC  | osa-miR171a      | 0  | 0    | 0  | 1  |
| GCUCACUUCUCUCUCUGUCAGC | osa-miR156c-3p   | 0  | 0    | 4  | 1  |
| AGACUACAAUUAUCUGAUCA   | osa-miR5083      | 0  | 1    | 0  | 1  |
| AUGGAAUAUAUGACAAAGGUGG | osa-miR5532      | 0  | 0    | 0  | 1  |
| UCCAAAGGGAUCGCAUUGAUCU | osa-miR393b-5p   | 0  | 0    | 1  | 1  |
| UCAUUGAGUGCAGCGUUGAUG  | ath-miR397a      | 0  | 0    | 3  | 1  |
| UGACAGAAGAAAGAGAGCAC   | ath-miR156h      | 0  | 4    | 0  | 1  |
| UCCCAAUGUAGACAAAGCA    | ath-miR158a-3p   | 4  | 6393 | 3  | 1  |
| UUGAGCCGUGCCAAUAUCACG  | ath-miR171b-3p   | 0  | 2    | 0  | 1  |
| UUGGCAUUCUGUCCACCUC    | ath-miR394a      | 0  | 34   | 2  | 1  |
| AUGAUGAUGAUGAUGAUGAAA  | ath-miR5658      | 7  | 3    | 0  | 1  |
| UGCAGUUGCUGCCUCAAGCUU  | osa-miR444a-3p.2 | 0  | 0    | 1  | 1  |
| GCAGCACCAUCAAGAUUCAC   | osa-miR172d-5p   | 0  | 0    | 0  | 1  |
| UGACAGAAGAGAGAGAGCACA  | osa-miR156k      | 0  | 0    | 1  | 1  |
| UUUUGGAACGGAGUGAGUAUU  | osa-miR1439      | 0  | 0    | 0  | 1  |
| UCGGCCUCGUGGAUGGACCAG  | osa-miR820a      | 0  | 0    | 0  | 1  |
| AGGUCAUGCUGUAGUUUCAUC  | osa-miR167h-3p   | 0  | 0    | 5  | 1  |

|                         |                  |   |    |   |   |
|-------------------------|------------------|---|----|---|---|
| UCCAAAGGGAUCGCAUUGAUCC  | ath-miR393a-5p   | 0 | 0  | 1 | 0 |
| UCCAAAGGGAUCGCAUUGAUC   | osa-miR393a      | 0 | 0  | 1 | 0 |
| CGACAGAAGAGAGUGAGCAC    | ath-miR156g      | 0 | 5  | 6 | 0 |
| UUAUUGAGUGCAGCGUUGAUG   | osa-miR397b      | 0 | 0  | 2 | 0 |
| AUUGGAUUGAAGGGAGCUCCG   | osa-miR159d      | 0 | 1  | 0 | 0 |
| AUUGGAUUGAAGGGAGCUCCU   | osa-miR159e      | 0 | 1  | 0 | 0 |
| AUUGGAUUGAAGGGAGCUCCA   | osa-miR159c      | 0 | 1  | 0 | 0 |
| UAUUGGCCUGGUUCACUCAGA   | ath-miR171a-5p   | 0 | 2  | 0 | 0 |
| UGCCAAAGGAGAGUUGCCUG    | ath-miR399b      | 0 | 3  | 1 | 0 |
| UAAUCUGCAUCCUGAGGUUUA   | ath-miR2111a-5p  | 0 | 1  | 0 | 0 |
| UUUCGUUGUCUGUUCGACCUU   | ath-miR858a      | 0 | 11 | 2 | 0 |
| GCUCUCUAGCCUUCUGUCAUC   | ath-miR157a-3p   | 0 | 3  | 0 | 0 |
| GCUCUCUAUACUUCUGUCACC   | ath-miR157c-3p   | 0 | 2  | 2 | 0 |
| GGAAUGUUGUCUGGAUCGAGG   | ath-miR165a-5p   | 0 | 2  | 0 | 0 |
| UGUGUUCUCAGGUCACCCUG    | ath-miR398b-3p   | 0 | 3  | 0 | 0 |
| GCAAGUUGACCUUGGCUCUGC   | ath-miR169f-3p   | 0 | 0  | 0 | 0 |
| CUUUGUCUACAAUUUUGGAAA   | ath-miR158a-5p   | 0 | 6  | 0 | 0 |
| GGACUGUUGUCUGGCUCGAGG   | ath-miR166a-5p   | 0 | 1  | 0 | 0 |
| UCCGGCAAGUUGACCUUGGCU   | ath-miR169g-3p   | 0 | 0  | 0 | 0 |
| UGCCAAAGGAGAUUUGCCUG    | ath-miR399a      | 0 | 1  | 0 | 0 |
| AUGGUCGAAGUAGGCAAAAUC   | ath-miR472-5p    | 0 | 2  | 0 | 0 |
| AAGCUCAGGAGGGAUAGCGCC   | ath-miR390a-5p   | 0 | 1  | 0 | 0 |
| CGCUAUCCAUCCUGAGUUC     | ath-miR390b-3p   | 0 | 2  | 0 | 0 |
| CUGAAGUGUUUGGGGGACUC    | ath-miR395b      | 0 | 9  | 0 | 0 |
| UGACAGAAGAGAGAGAGCAG    | ath-miR156i      | 0 | 0  | 0 | 0 |
| GGAAUGUUGUCUGGCACGAGG   | ath-miR166e-5p   | 0 | 9  | 0 | 0 |
| UAGACCAUUUGUGAGAAGGGA   | ath-miR824-5p    | 0 | 4  | 0 | 0 |
| CCUUCUCAUCGAUGGUCUAGA   | ath-miR824-3p    | 0 | 5  | 0 | 0 |
| UGAAAGUGACUACAUCGGGGU   | ath-miR161.1     | 0 | 51 | 0 | 0 |
| CCCCAAAUGUAGACAAAGCA    | ath-miR158b      | 0 | 24 | 0 | 0 |
| CGCUAUCCAUCCUGAGUUUCA   | ath-miR390a-3p   | 0 | 1  | 1 | 0 |
| GCUCACUCUCUAUCCGUCACC   | ath-miR156f-3p   | 0 | 1  | 0 | 0 |
| UUCGUUGUCUGUUCGACCUUG   | ath-miR858b      | 0 | 4  | 2 | 0 |
| UUAGAUGACCAUCAACAAACU   | ath-miR827       | 0 | 1  | 0 | 0 |
| ACAGGGAACAAGCAGAGCAUG   | ath-miR408-5p    | 0 | 4  | 0 | 0 |
| UGCUCACCUCUCUUUCUGUCAGU | ath-miR156b-3p   | 0 | 12 | 0 | 0 |
| GCUCAAGAAAGCUGUGGGAAA   | ath-miR396b-3p   | 0 | 3  | 0 | 0 |
| GUGAAGUGUUUGGGGGAACUC   | osa-miR395d      | 0 | 2  | 0 | 0 |
| UUGCUGCCUCAAGCUUGCUGC   | osa-miR444a-3p.1 | 0 | 1  | 0 | 0 |
| UGAUUGAGCCGUGCCAAUAUC   | osa-miR171b      | 0 | 2  | 0 | 0 |
| UGCCAAAGGAGAAUUGCCUG    | osa-miR399a      | 0 | 1  | 0 | 0 |
| GUUCGCGUCGGGUUCACCA     | osa-miR5077      | 0 | 15 | 0 | 0 |
| CUUGGAUUGAAGGGAGCUCUA   | osa-miR159f      | 0 | 6  | 0 | 0 |

|                           |                 |                 |                 |                 |                 |
|---------------------------|-----------------|-----------------|-----------------|-----------------|-----------------|
| GUGAAGUGUUUGGAGGAACUC     | osa-miR395c     | 0               | 1               | 0               | 0               |
| UGCCAAAGGAGAGUUGCCCUA     | osa-miR399j     | 0               | 1               | 0               | 0               |
| AUGAAGUGUUUGGAGGAACUC     | osa-miR395o     | 0               | 1               | 0               | 0               |
| UCGGACCAGGCUUCAAUCCCU     | osa-miR166k-3p  | 0               | 0               | 3               | 0               |
| GAUCCCGCCUUGCACCAAGUGAAU  | osa-miR168a-3p  | 0               | 0               | 1               | 0               |
| AGCUCUGAUACCAUGUUAGAUAUAG | osa-miR1863a    | 0               | 0               | 1               | 0               |
| GGUCAAGAAAGCUGUGGGGAAG    | osa-miR396c-3p  | 0               | 0               | 1               | 0               |
| CAGGGAUGAGGCAGAGCAUGG     | osa-miR408-5p   | 0               | 0               | 3               | 0               |
| UGGAGAAGCAGGGUACGUGCA     | osa-miR164c     | 0               | 0               | 1               | 0               |
| CGAUUCCCCAGCGGAGUCGCCA    | osa-miR5072     | 3               | 0               | 0               | 0               |
| Plant miRNA reads         |                 | 303             | 16406           | 40116           | 73954           |
| total RNA reads           |                 | 10 <sup>7</sup> | 10 <sup>7</sup> | 10 <sup>7</sup> | 10 <sup>7</sup> |
|                           |                 |                 |                 |                 |                 |
| Sequence                  | Animal miRNAs   | RJ              | H               | BB              | P               |
| UGGACGGAGAACUGAUAAAGGGC   | ame-miR-184     | 21480           | 1561            | 70              | 97              |
| AUACGGUGAUGAGUUUAAACAG    | ame-miR-3720    | 18775           | 254             | 1               | 7               |
| UCUUUGGUUAUCUAGCUGUAUGA   | ame-miR-9a      | 9632            | 1492            | 106             | 163             |
| UAGGAACUUCAUACCGUGCUCU    | ame-miR-276     | 6116            | 10100           | 368             | 452             |
| GGCAAGAUGUCGGCAUAGCUGA    | ame-miR-31a     | 5640            | 341             | 11              | 6               |
| UGGAAUGUAAAGAAGUAUGGAG    | ame-miR-1       | 5051            | 2513            | 130             | 392             |
| UGAGAUCAUUGUGAAAGCUGAUU   | ame-bantam      | 4907            | 459             | 100             | 166             |
| UAAUACUGUCAGGUAAGAUGUC    | ame-miR-8       | 4675            | 1151            | 18              | 43              |
| CCAGAUCUAAACUCUCCAGCUC    | ame-miR-750     | 1565            | 476             | 30              | 31              |
| AACCCGUAGAUCCGAACUUGUG    | ame-miR-100     | 1471            | 741             | 65              | 81              |
| UUUUGAUUGUUGCUCAGAAAGC    | ame-miR-315     | 1467            | 53              | 18              | 22              |
| UCAGGUACUGAGUGACUCUGAG    | ame-miR-306     | 1315            | 71              | 0               | 1               |
| ACCCUGUAGAUCCGAAUUUGU     | ame-miR-10      | 966             | 162             | 38              | 59              |
| ACCCUGUAGAUCCGAAUUUGUU    | dme-miR-10-5p   | 966             | 162             | 38              | 59              |
| CAUCUUACCGGGCAGCAUUAGA    | dme-miR-8-5p    | 939             | 246             | 9               | 3               |
| UCGGUGGGACUUUCGUCCGUUU    | ame-miR-278     | 800             | 82              | 0               | 3               |
| AUGCAAAGCUAGAACUCAUAGA    | ame-miR-6052    | 714             | 16              | 0               | 2               |
| GUAAAUGGCACUGGAAGAAUUCAC  | ame-miR-263a    | 658             | 218             | 34              | 44              |
| AAUGGCACUGGAAGAAUUCACGGG  | dme-miR-263a-5p | 658             | 218             | 34              | 44              |
| AUUGUACUUCAUCAGGUGCUCUG   | ame-miR-305     | 477             | 313             | 1               | 9               |
| UACCCUGUAAACGUCCUGAGACU   | ame-miR-3785    | 457             | 33              | 0               | 0               |
| AAAUAUCAGCUGGUAUUUCU      | ame-miR-283     | 342             | 267             | 3               | 13              |
| AAAUAUCAGCUGGUAUUUCUGG    | dme-miR-283-5p  | 342             | 267             | 3               | 13              |
| UCAGGUACCUGAAGUAGCGCGCG   | ame-miR-275     | 341             | 540             | 1               | 10              |
| UAAGCUCUGUGUACUUUUUAC     | ame-miR-6037    | 297             | 35              | 0               | 0               |

|                           |                 |     |     |    |    |
|---------------------------|-----------------|-----|-----|----|----|
| UUUGUUCGUUCGGCUCGAGUUA    | ame-miR-375     | 282 | 178 | 1  | 5  |
| AUAUGAACUCUUAUGUACGUGA    | ame-miR-6005-5p | 192 | 8   | 0  | 0  |
| CUUGUCCUGGUUCAUGUAGGGCG   | ame-miR-3786    | 183 | 9   | 0  | 1  |
| UUAUGAUCUGGAAUACUAGG      | ame-miR-9893    | 158 | 0   | 0  | 0  |
| GAAGCUCGUCUCUACAGGUAUCU   | ame-miR-993     | 136 | 15  | 0  | 1  |
| CAUCACAGGCAGAGUUCUAGUU    | ame-miR-11      | 121 | 186 | 0  | 2  |
| UGUCAUGGAGUUGCUCUCUUUGU   | ame-miR-281     | 117 | 182 | 1  | 3  |
| UGAAAGACAUGGGUAGUGA       | ame-miR-71      | 116 | 43  | 2  | 4  |
| UUUGUGACUGUAACAACAAUG     | ame-miR-6057    | 116 | 0   | 0  | 0  |
| UGAGGUAGUAGGUUGUAUAGU     | ame-let-7       | 115 | 192 | 52 | 64 |
| CUUGGCACUGGAAGAAUUCAC     | ame-miR-263b    | 111 | 59  | 40 | 39 |
| CGUGAUGUGACGUAGUGGUUCU    | ame-miR-989     | 110 | 40  | 0  | 0  |
| UGACUAGAUCACACUCAUCCA     | ame-miR-279d    | 78  | 82  | 18 | 26 |
| UGACUAGAUACAUACUCGUCU     | ame-miR-996     | 72  | 10  | 0  | 0  |
| UGACUAGAUCGAAAUACUCGUCCC  | ame-miR-279b    | 66  | 11  | 0  | 1  |
| AAUUGCACCCGUCCCGGCCUGA    | ame-miR-92b     | 62  | 10  | 0  | 0  |
| GACUCACGUCGACUGGGUGUCCGC  | ame-miR-3759    | 61  | 25  | 0  | 1  |
| UAAUCUCAUGCGGUAACUGUGAG   | ame-miR-3477    | 60  | 170 | 0  | 7  |
| AUAAGUACUAGUGCCGCAGGAG    | ame-miR-252a    | 60  | 42  | 0  | 0  |
| ACGUAUACUGAAUGUAUCCUGA    | ame-miR-iab-4   | 57  | 2   | 0  | 0  |
| UCAGUCUUUUUCUCUCUCCUAU    | dme-miR-14-3p   | 56  | 70  | 11 | 12 |
| UAUCACAGCAGUAGUUACCUGGU   | ame-miR-2944    | 56  | 30  | 1  | 1  |
| UCAGUCUUUUUCUCUCUCCUA     | ame-miR-14      | 55  | 68  | 12 | 12 |
| AAAAUUGCGCACGCUCUGAAUUAU  | ame-miR-6051    | 54  | 11  | 0  | 1  |
| UGGAAGACUAGUGAUUUUGUUGU   | ame-miR-7       | 51  | 245 | 32 | 84 |
| CAAUUCGGUUCUAGAGAGGUUU    | dme-miR-10-3p   | 49  | 86  | 3  | 4  |
| GUGAGCAAAGUUUCAGGUGU      | ame-miR-87      | 43  | 25  | 1  | 4  |
| UAAAUGCACUAUCUGGUACGACA   | ame-miR-277     | 42  | 38  | 3  | 1  |
| UAGUACGGGCAGUACUGGGA      | ame-miR-6040    | 42  | 6   | 0  | 0  |
| UGACUAGAUCACACUCAUUA      | ame-miR-279a    | 32  | 78  | 3  | 1  |
| UUUCGAGGCUGUUUAAAUGGAUU   | ame-miR-9864    | 31  | 2   | 0  | 1  |
| UGAACACAGCUGGUGGUAUCUCAGU | ame-miR-317     | 31  | 23  | 2  | 3  |
| UAUCACAGCCAUUUUUGACGAUU   | ame-miR-13b     | 27  | 2   | 0  | 1  |
| UGGCAAGAUGUCGGCAUAGCUGA   | dme-miR-31a-5p  | 27  | 2   | 1  | 0  |
| UAUCACAGCCAUUUUGAUGAG     | ame-miR-13a     | 26  | 2   | 0  | 0  |
| GUAGGCCGCGGAAACUACUUGC    | ame-miR-2796    | 21  | 17  | 4  | 5  |
| CCCCUGAGACCCUAACUUGUGA    | ame-miR-125     | 21  | 53  | 1  | 0  |
| AGAUAUGUUUGAUUUCUUGGUUGU  | ame-miR-190     | 20  | 35  | 6  | 4  |
| AGAUAUGUUUGAUUUCUUGGUUG   | dme-miR-190-5p  | 20  | 37  | 6  | 4  |
| UGAGUAUUACAUCAGGUACUGGU   | ame-miR-12      | 18  | 7   | 0  | 0  |
| UUUUAGAAUCCUACGCUUUACC    | ame-miR-927a    | 16  | 17  | 0  | 0  |
| UUUAGAAUCCUACGCUUUACC     | dme-miR-927-5p  | 16  | 17  | 0  | 0  |
| UAUCACAGCCAGCUUUGAUGAGC   | ame-miR-2       | 15  | 16  | 2  | 6  |

|                          |                 |    |    |   |    |
|--------------------------|-----------------|----|----|---|----|
| CUGAUUUCUUUCAUAAGGAGGA   | ame-miR-3756    | 13 | 0  | 0 | 0  |
| UGACUAGAGUCACACUCGUCCA   | ame-miR-279c    | 10 | 11 | 1 | 0  |
| UCACCGGGUAGGAUUCAUCCA    | ame-miR-3791    | 6  | 48 | 3 | 5  |
| UCCUGAGACCCUAACUUGUGA    | dme-miR-125-5p  | 6  | 11 | 8 | 3  |
| CUAAGUACUAGUGCCGCAGGAG   | dme-miR-252-5p  | 6  | 8  | 2 | 1  |
| UAAGCGUAUAGCUUUUUCUUU    | ame-miR-965-3p  | 6  | 0  | 0 | 0  |
| UUCGGAAGAAUGUAGAGAAAAAG  | ame-miR-9890    | 6  | 0  | 0 | 0  |
| UUGGUCCCCUUAACCAGCUGU    | ame-miR-133     | 5  | 7  | 2 | 10 |
| UUAAGUAGUAGUGUCGUAGAUGA  | ame-miR-252b    | 4  | 24 | 0 | 0  |
| GUAGGUAACGACUGAUGGGAAC   | ame-miR-6001-5p | 4  | 50 | 0 | 0  |
| AAGAGGCUUCUUAGGCAAGUGAU  | ame-miR-6044    | 4  | 2  | 0 | 0  |
| GUGCAUUGUAGUUGCAUUG      | ame-miR-33      | 4  | 0  | 0 | 0  |
| UAAAGCUAGAUUACCAAAGCA    | ame-miR-79      | 4  | 0  | 0 | 0  |
| UAAAGCUAGAUUACCAAAGCAU   | dme-miR-79-3p   | 4  | 0  | 0 | 0  |
| UUAUUGCUUGAGAAUACACGUA   | ame-miR-137     | 3  | 3  | 1 | 0  |
| AUUGCACUUGUCCCGGCCUUAU   | ame-miR-92a     | 3  | 16 | 0 | 0  |
| AUUCACUGGACGGCAAUGGGCU   | ame-miR-6045    | 3  | 1  | 0 | 0  |
| UCGUGACUUCUUUCAGCCCCU    | ame-miR-3743    | 3  | 1  | 0 | 0  |
| UUCUCUUUGGUUGUUACCACUA   | ame-miR-6001-3p | 3  | 16 | 0 | 0  |
| UAUUGCUUGAGAAUACACGUAG   | dme-miR-137-3p  | 3  | 3  | 1 | 0  |
| UAGGAACGGUAGUAGUGGAGA    | ame-miR-6042    | 3  | 0  | 0 | 0  |
| UUCGUUGUCAACGAAACCUGCA   | ame-miR-981     | 3  | 0  | 0 | 0  |
| UCGGUAAGCAGAGUAUAAGACCU  | ame-miR-3715    | 2  | 20 | 0 | 0  |
| UAGGAACUAAUACCGUGCUCU    | dme-miR-276b-3p | 2  | 3  | 0 | 0  |
| UGAUUUAUGUGGUGAUUGUGC    | ame-miR-9865    | 2  | 0  | 0 | 0  |
| AUACGAAAGACCGCGCGGAUGU   | ame-miR-6053    | 2  | 0  | 0 | 0  |
| UGAACACAGCUGGUGGUAUCCAGU | dme-miR-317-3p  | 2  | 1  | 0 | 1  |
| AUUGACUCUAGUAGGGAGUCC    | ame-miR-929     | 2  | 0  | 0 | 0  |
| AAAUUGACUCUAGUAGGGAGUC   | dme-miR-929-5p  | 2  | 0  | 0 | 0  |
| UGUUAACUGUAAGACUGUGUCU   | dme-miR-999-3p  | 1  | 4  | 0 | 1  |
| UACGGAUUGCGUGACUUUUCGA   | ame-miR-3719    | 1  | 2  | 0 | 0  |
| UAGCACCAUUUGAAAUCAGU     | ame-miR-29b     | 1  | 7  | 0 | 0  |
| UGGUAACUCCACCACCGUUGGC   | ame-miR-2765-5p | 1  | 19 | 0 | 0  |
| AUGGUGACCGUGAUCUAUCCA    | ame-miR-6043    | 1  | 3  | 0 | 0  |
| UCGGGAAGGUAGUUGCGGCGGAU  | ame-miR-3049-5p | 1  | 8  | 0 | 0  |
| UCACAACCUUUUUGAGUGAGCGA  | ame-miR-307     | 1  | 1  | 0 | 0  |
| AAAUUCAUCGAGAUCGAAGGA    | ame-miR-6041    | 1  | 1  | 0 | 0  |
| UUUUAGAAUUUGUACGCUCUGU   | ame-miR-927b    | 1  | 1  | 0 | 0  |
| UGUCUUUUUCCGCUUUGCUGCCG  | ame-miR-316     | 1  | 7  | 0 | 0  |
| UGGCAGUGUUGUUAGCUGGUUG   | ame-miR-34      | 1  | 3  | 0 | 0  |
| CAGCGAGGUUAUAGAGUCCUACG  | dme-miR-276b-5p | 1  | 2  | 0 | 0  |
| UCGGCAAUGAUCGGACGUGGUC   | ame-miR-9885    | 1  | 0  | 0 | 0  |
| UCACUGGGUUAUGUUUGUCCC    | ame-miR-318     | 1  | 0  | 0 | 0  |

|                          |                  |        |        |        |        |
|--------------------------|------------------|--------|--------|--------|--------|
| UCGGUCGGUGACGAAGCUC      | ame-miR-9884     | 1      | 0      | 0      | 0      |
| UGGGAUGUUGAAUCUGUUGCAG   | ame-miR-9878     | 1      | 0      | 0      | 0      |
| UCGUGUCCGUUUCUGUUUCGA    | ame-miR-9895     | 1      | 0      | 0      | 0      |
| UAAGGCACGCGGUGAAUGCCAAG  | ame-miR-124      | 1      | 0      | 0      | 0      |
| UAAGUGAUUGAUCGAUCGUGGAU  | ame-miR-3781     | 1      | 0      | 0      | 0      |
| UAGAGGGAGAGACGGAACCA     | ame-miR-6059     | 1      | 0      | 0      | 0      |
| GACGUUGCACGUUACCACGCCG   | ame-miR-6061     | 1      | 0      | 0      | 0      |
| UGACGCGAUUGUGGAAAUCG     | ame-miR-9892     | 1      | 0      | 0      | 0      |
| UGCGAGAUUUUUUCAGUCGUG    | ame-miR-3747b    | 1      | 0      | 0      | 0      |
| UAGGCGUCACGUUGUGGAACG    | ame-miR-9886     | 1      | 0      | 0      | 0      |
| AACCCGUAUUCCGAACUUGUG    | dme-miR-100-5p   | 1      | 0      | 0      | 0      |
| UAUCACAGCCAGCUUUGAUGGGC  | dme-miR-2c-3p    | 1      | 0      | 0      | 0      |
| UGGCAGUGUGGUUAGCUGGUUGUG | dme-miR-34-5p    | 0      | 1      | 1      | 6      |
| AAGAGAGCUAUCCGUCGACAGU   | dme-miR-281-2-5p | 0      | 0      | 3      | 4      |
| UCAAUUCCGUAGUGCAUUGCAG   | ame-miR-932      | 0      | 0      | 0      | 1      |
| UCCCCUGUCCUGUCCGAUAG     | ame-miR-3718a    | 0      | 1      | 0      | 1      |
| CUUGGCACUGGGAGAAUUCAC    | dme-miR-263b-5p  | 0      | 0      | 0      | 1      |
| CGUGGGUACUACUCGUCUCUAU   | ame-miR-6000a-5p | 0      | 3      | 0      | 0      |
| AACGAGUGGUGGAUGCCAGCGU   | ame-miR-3726     | 0      | 2      | 0      | 0      |
| CAAUGCCCUUCGAAAUCCCAA    | ame-miR-2788     | 0      | 1      | 0      | 0      |
| AAACGGAUCAAGCUUUUUGUGA   | ame-miR-6067     | 0      | 1      | 0      | 0      |
| UGAGAUUCACUCCUCCAACUAC   | ame-miR-1175     | 0      | 4      | 0      | 0      |
| UCGACGAGAAUCCGUGACCGGU   | ame-miR-6046     | 0      | 1      | 0      | 0      |
| UAGAGACGAGUAGUACCCACGAG  | ame-miR-6000b    | 0      | 1      | 0      | 0      |
| UGAGAUCAUUUUGAAAGCUGAUU  | dme-bantam-3p    | 0      | 1      | 0      | 0      |
| CAUCACAGUCUGAGUUCUUGC    | dme-miR-11-3p    | 0      | 0      | 3      | 0      |
| UCUUUGGUAUUCUAGCUGUAGA   | dme-miR-9c-5p    | 0      | 0      | 1      | 0      |
| Animal miRNA reads       |                  | 93239  | 24221  | 1306   | 2052   |
| total RNA reads          |                  | $10^7$ | $10^7$ | $10^7$ | $10^7$ |
