# Supplementary material for: Plant microRNAs in larval food regulate honeybee caste development
Source: PubMed Central journal article supplement (PMC5578494; doi:10.1371/journal.pgen.1006946), 2017-08-31
Supplement: pgen.1006946.s015.pdf [file pgen.1006946.s015.pdf]

**Table S3. Functional analysis of gene lists using GO terms.** A list of orthologous genes of honeybee and *Drosophila* was examined for significant associations with specific GO functional categories based on the annotation of *Drosophila* genes. Among the 10 top-ranked GO categories, 6 are directly related to development process. As a control, none of the irrelevant GO categories is related to development process.

| GO functional categories                           | Total numbers of <i>Drosophila</i> genes in the GO terms (total number = 14217) | Numbers of examined genes in the GO terms (total number = 96) | P-value  |
|----------------------------------------------------|---------------------------------------------------------------------------------|---------------------------------------------------------------|----------|
| The top 10 relevant GO process                     |                                                                                 |                                                               |          |
| system development (GO:0048731)                    | 2296                                                                            | 49                                                            | 9.92E-12 |
| biological regulation (GO:0065007)                 | 3990                                                                            | 64                                                            | 1.50E-11 |
| single-multicellular organism process (GO:0044707) | 3199                                                                            | 57                                                            | 2.73E-11 |
| multicellular organismal process (GO:0032501)      | 4088                                                                            | 64                                                            | 5.24E-11 |
| anatomical structure development (GO:0048856)      | 3197                                                                            | 56                                                            | 1.32E-10 |
| single-organism developmental process (GO:0044767) | 3310                                                                            | 56                                                            | 6.18E-10 |
| multicellular organism development (GO:0007275)    | 2880                                                                            | 52                                                            | 7.76E-10 |
| developmental process (GO:0032502)                 | 3351                                                                            | 56                                                            | 1.06E-09 |
| animal organ development (GO:0048513)              | 1321                                                                            | 34                                                            | 8.13E-09 |
| regulation of biological process (GO:0050789)      | 3615                                                                            | 56                                                            | 2.86E-08 |
|                                                    |                                                                                 |                                                               |          |
| The top 10 irrelevant GO process                   |                                                                                 |                                                               |          |
| biological_process (GO:0008150)                    | 11306                                                                           | 88                                                            | 1.00E+00 |
| localization (GO:0051179)                          | 2134                                                                            | 27                                                            | 1.00E+00 |
| metabolic process (GO:0008152)                     | 4663                                                                            | 25                                                            | 1.00E+00 |
| transport (GO:0006810)                             | 1695                                                                            | 23                                                            | 1.00E+00 |
| organelle organization (GO:0006996)                | 1729                                                                            | 23                                                            | 1.00E+00 |
| establishment of localization (GO:0051234)         | 1764                                                                            | 23                                                            | 1.00E+00 |
| nitrogen compound metabolic process                | 3624                                                                            | 23                                                            | 1.00E+00 |

|                                                     |      |    |          |
|-----------------------------------------------------|------|----|----------|
| (GO:0006807)                                        |      |    |          |
| primary metabolic process<br>(GO:0044238)           | 3849 | 23 | 1.00E+00 |
| organic substance metabolic process<br>(GO:0071704) | 4182 | 23 | 1.00E+00 |
| multi-organism process (GO:0051704)                 | 1486 | 22 | 1.00E+00 |
