# Supplementary material for: Plant microRNAs in larval food regulate honeybee caste development
Source: PubMed Central journal article supplement (PMC5578494; doi:10.1371/journal.pgen.1006946), 2017-08-31
Supplement: pgen.1006946.s016.pdf [file pgen.1006946.s016.pdf]

**Table S4. Potential target genes for individual plant miRNAs.**

**Target gene of plant miRNAs: TOR**

| MIRNA          | Position in target gene | Structure of binding site                                                                                                                                                               | minimum of free energy |
|----------------|-------------------------|-----------------------------------------------------------------------------------------------------------------------------------------------------------------------------------------|------------------------|
| ath-miR156a-5p | 1687                    | <pre> U   UGA       UACA  A-- GUGC UCAUUUUCU  UCUG         : :       CACG  AGUGAGAGA  AGAC -   ---       ----  AGU                     </pre>                                           | -22                    |
| ath-miR160a-5p | 6109                    | <pre> C   U   C   AGUUUAU U   A   G UGGC GUAC GGGA       G CCGGG CA      :              :      ACCG UAUG CCCU       C GGUCC GU -   -   U   - - - - - - - - -                     </pre> | -27.5                  |
| ath-miR162a-3p | 3678                    | <pre> G   AUG UA   A       U CUGGA  GC  AGA GUUUGUCGA                  :       GACCU  CG  UCU CAAAUAGCU -   A-- --  C       -                     </pre>                                | -26.4                  |
| osa-miR166g-3p | 5448                    | <pre> A   UAU       AUUG  A GAGG  AUGAAGCU  UCGA              :  :    CUCC  UACUUCGG  GGCU -   U--       ACCA  -                     </pre>                                             | -25                    |
| ath-miR167a-5p | 3738                    | <pre> A           G  UCUU  A-- AGAUCAUGUU GGC  GC         :          UCUAGUACGA CCG  CG A           -  U---  AAGU                     </pre>                                            | -26.4                  |
| ath-miR168a-5p | 1547                    | <pre> A   --       UGGACU  A- UCCUGG  UGCACCA  GC      :               AGGGCU  ACGUGGU  CG A   GG       U----  CU                     </pre>                                            | -26.6                  |

|                |      |                                                                                                                                    |       |
|----------------|------|------------------------------------------------------------------------------------------------------------------------------------|-------|
| ath-miR172c    | 5164 | G      UA GAA U      A<br>CUGCAGC CA CA GAUUCU<br>                          <br>GACGUCG GU GU CUAAGA<br>-      UA A-- U      -     | -24.3 |
| ath-miR390a-5p | 5148 | U            AUUA G C A<br>GUGCUAUCUU U CUG AGCU<br> :     :              <br>CGCGAUAGGG A GAC UCGA<br>C            ---- G - A     | -26.4 |
| ath-miR824-5p  | 6380 | U A A -    AUA      A<br>UCC CU UC CACAA GUGGUUA<br>                 :   : <br>AGG GA AG GUGUU UACCAGAU<br>- - - A      ---      - | -23.6 |

### Target gene of plant miRNAs: IRS

| MIRNA          | Position in target gene | Structure of binding site                                                                                                                                    | minimum of free energy |
|----------------|-------------------------|--------------------------------------------------------------------------------------------------------------------------------------------------------------|------------------------|
| ath-miR156a-5p | 1765                    | A G      CCGAUGA      C<br>UG UCAUUUUC      UCUGUCG<br>      :            :<br>AC AGUGAGAG      AGACAGU<br>C G      A-----      -                            | -23                    |
| ath-miR157a-5p | 4706                    | C      GCG CCGUACG      -      C-<br>GUGCUC C      UAUCU CUGUU<br>                         :<br>CACGAG G      AUAGA GACAG<br>-      A-- -----      A      UU | -21.3                  |
| ath-miR158a-3p | 860                     | G GG GGA      ---      U<br>GCU UG CUGC UGGGA<br>           :         <br>CGA AC GAUG ACCCU<br>A A- A--      UAA      -                                      | -20.3                  |
| ath-miR160a-5p | 859                     | G - GU CU A-<br>GGC UG GGGG GCUGGG                                                                                                                           | -27.9                  |

|                |      |                                                                                                            |       |
|----------------|------|------------------------------------------------------------------------------------------------------------|-------|
|                |      | ::                                                                                                         |       |
|                |      | CCG AU CCCU CGGUCC                                                                                         |       |
|                |      | A U GU -- GU                                                                                               |       |
| ath-miR162a-3p | 1380 | A A U GAAAAUG A<br>UGGAUG UGG GGU UGUUGG<br>      ::       :: :<br>ACCUAC GUC CCA AUAGCU<br>G - U A----- - | -22.9 |
| ath-miR166a-3p | 2497 | C U - AGAA A A-<br>GG GGAA GAAGC GG CC<br>                  <br>CC CCUU CUUCG CC GG<br>- - A GA-- A CU     | -23.5 |
| osa-miR166g-3p | 1589 | -U UC- U - A-<br>GGA GAG CCUGG CC<br>    :           <br>CCU UUC GGACC GG<br>CU UAC - A CU                 | -23.6 |
| ath-miR167a-5p | 841  | -C U ACCGG G--<br>GGUCG UGCUUGU GGCU<br> :: :      : :   <br>CUAGU ACGACCG UCGA<br>AU - ----- AGU          | -25.9 |
| ath-miR168a-5p | 1881 | C - GAGACGAU UG G<br>UUCC ACCUG U CAAGCGA<br> :               <br>AGGG UGGAC G GUUCGCU<br>A C ----- UG -   | -27.9 |
| ath-miR172a    | 1340 | -C GU GU CAC G<br>G GCGU UC GGAUUCU<br>   :     :   <br>C CGUA AG UCUAAGA<br>UA GU GU U-- -                | -23.7 |
| ath-miR172c    | 1340 | -C GU GU CAC G<br>G GCGU UC GGAUUCU<br>   :     :   <br>C CGUA AG UCUAAGA                                  | -23.7 |

|                |      |                                                                                                      |       |
|----------------|------|------------------------------------------------------------------------------------------------------|-------|
|                |      | GA GU GU U-- -                                                                                       |       |
| ath-miR390a-5p | 2905 | -C - U CC A-<br>CGC AUC CCUCC GAGC<br>                  <br>GCG UAG GGAGG CUCG<br>CC A - A- AA       | -27   |
| ath-miR397a    | 1132 | G GUUUU A- G<br>AUCA ACGCUGUGC AAUGG<br>            :      :<br>UAGU UGCGACGUG UUACU<br>G ----- AG - | -23.6 |
| osa-miR528-5p  | 1337 | U GG ACGGA G<br>UCC UGCGUGUCC UUCU<br>       : : :     :<br>AGG ACGUACGGGG AAGG<br>G AG ----- U      | -26.5 |
| ath-miR824-5p  | 1747 | A GCAUAA - A-<br>UCCUUC UCACA AUGGUC<br>:                  <br>GGGAAG AGUGU UACCAG<br>A ----- U AU   | -25.8 |
| ath-miR827     | 3725 | ---A AUA - A--<br>UGU UGAUGG CAUC<br>              <br>ACA ACUACC GUAG<br>UCAA --- A AUU             | -20.3 |
| ath-miR845a    | 842  | G UUGC C G<br>GUCG UGGUA CGGGGCUG<br>:  :       : : : <br>UAGU ACCAU GUCUCGGC<br>G UA-- A -          | -26.1 |

### Target gene of plant miRNAs: EGFR

| MIRNA | Position in target gene | Structure of binding site | minimum of free energy |
|-------|-------------------------|---------------------------|------------------------|
|-------|-------------------------|---------------------------|------------------------|

|                |      |                                                                                                                              |       |
|----------------|------|------------------------------------------------------------------------------------------------------------------------------|-------|
| ath-miR156a-5p | 4761 | -A - GA G-<br>GUUCGCUC CUU CUGU<br> : :               <br>CGAGUGAG GAA GACA<br>CA A -- GU                                    | -23   |
| ath-miR157a-5p | 4426 | ---A GAUUU C<br>UCUCUGUCUUC UCAA<br>         :                <br>AGAGAUAGAAG AGUU<br>CACG AC--- -                           | -23.5 |
| ath-miR158a-3p | 2209 | G UGAAAC AAGGUG U<br>UGCUUU GUUUA CA UUUGGG<br>                           <br>ACGAAA CAGAUGU AAACCC<br>- - - - - - - - - - U | -21.5 |
| ath-miR160a-5p | 194  | A - U AG C<br>GGC UGC GGGGAG GGGC<br>       :                <br>CCG AUG UCCCUC UCCG<br>A U - GG U                           | -30.8 |
| ath-miR162a-3p | 2897 | U U-- ACGCCGA G<br>UGGAUGC GG GUCGA<br>                           <br>ACCUACG CC UAGCU<br>G UCU AAA---- -                    | -22.8 |
| ath-miR166a-3p | 201  | U A GG AGAACU A A<br>GGGGAG G GCCUG GUC GA<br>                           <br>CCCCUU C CGGAC CAG CU<br>- A UU - - - - - G -   | -30.2 |
| osa-miR166g-3p | 201  | U A GG AGAACU A A<br>GGGGAG G GCCUG GUC GA<br> :   :                    <br>CUCCUU C CGGAC CAG CU<br>- A UU - - - - - G -    | -27.2 |
| ath-miR167a-5p | 253  | ---C G GGCAGGU G<br>UCA UGCUGGCA GCUUCG                                                                                      | -27.3 |

|                |      |  |                         |        |       |
|----------------|------|--|-------------------------|--------|-------|
|                |      |  |                         | :      |       |
|                |      |  | AGU ACGACCGU            | CGAAGU |       |
|                |      |  | AUCU -                  | -----  | -     |
|                |      |  | A GAUAUCU U AG U        |        |       |
|                |      |  | UCCUGGCC UGC AUCA GGCGA |        |       |
| ath-miR168a-5p | 2968 |  | : :                     | :  :   | -29.9 |
|                |      |  | AGGGCUGG ACG UGGU UCGCU |        |       |
|                |      |  | A ----- - -- -          |        |       |
|                |      |  | U C U UAU G             |        |       |
|                |      |  | UGCGG CAUCAUCA G UUCU   |        |       |
| ath-miR172a    | 2020 |  | :                       |        | -26.2 |
|                |      |  | ACGUC GUAGUAGU C AAGA   |        |       |
|                |      |  | U - U U-- -             |        |       |
|                |      |  | U C U UAU G             |        |       |
|                |      |  | UGCGG CAUCAUCA G UUCU   |        |       |
| ath-miR172c    | 2020 |  | :                       |        | -26.4 |
|                |      |  | ACGUC GUAGUAGU C AAGA   |        |       |
|                |      |  | G - U U-- -             |        |       |
|                |      |  | A UCGGG AA GCGG G-      |        |       |
|                |      |  | GGUGCU CCC UCC GAGU     |        |       |
| ath-miR390a-5p | 270  |  | :                       | :      | -27.9 |
|                |      |  | CCGCGA GGG AGG CUCG     |        |       |
|                |      |  | - UA--- -- A--- AA      |        |       |
|                |      |  | A G AUU C--             |        |       |
|                |      |  | CAUCGA GC UGUUAUCGA     |        |       |
| ath-miR397a    | 5603 |  | :                       | : : :  | -23.5 |
|                |      |  | GUAGUU CG ACGUGAGUU     |        |       |
|                |      |  | - G --- ACU             |        |       |
|                |      |  | G GUUGAG AUG C A--      |        |       |
|                |      |  | GAGUU GU GCG GAAUC      |        |       |
| ath-miR403-3p  | 3263 |  |                         |        | -20.2 |
|                |      |  | CUCAA CA CGC CUUAG      |        |       |
|                |      |  | G A----- --- A AUU      |        |       |
|                |      |  | -C - AGUA G             |        |       |
|                |      |  | UUUCUGCAU CC CUUCCG     |        |       |
| osa-miR528-5p  | 3144 |  | ::                      | :      | -27.5 |
|                |      |  | GGAGACGUA GG GAAGGU     |        |       |

|               |      |           |       |      |      |       |
|---------------|------|-----------|-------|------|------|-------|
|               |      | GA        | C     | G--- | -    |       |
| ath-miR824-5p | 2118 | C         | G C   | C    | G-   | -20.8 |
|               |      | CCCUUC    | C CAA | UGG  | C    |       |
|               |      |           |       |      |      |       |
|               |      | GGGAAG    | G GUU | ACC  | G    |       |
|               |      | A         | A U   | U    | A AU |       |
| ath-miR845a   | 2492 | ---A      | ACA   | UU   | A    | -23.2 |
|               |      | AAUUGGUGU | CAGA  | GCC  |      |       |
|               |      | :         |       |      |      |       |
|               |      | UUAACCAUA | GUCU  | CGG  |      |       |
|               |      | GUAG      | ---   | --   | C    |       |

### Target gene of plant miRNAs: PDK1

| MIRNA          | Position in target gene | Structure of binding site                                                                                   | minimum of free energy |
|----------------|-------------------------|-------------------------------------------------------------------------------------------------------------|------------------------|
| ath-miR156a-5p | 4978                    | -C C CUC C U<br>GU CACUCUCU UCU GUCG<br> :              :<br>CG GUGAGAGA AGA CAGU<br>CA A --- - -           | -25                    |
| ath-miR157a-5p | 5143                    | -A A GACGCG U A<br>GC UCUU GUC UUCUGUCGA<br>      : :        : <br>CG AGAG UAG AAGACAGUU<br>CA - A----- - - | -24.2                  |
| ath-miR160a-5p | 4947                    | G AAA C G U<br>GGCG ACGGGG GC CAGGC<br>   :   :             <br>CCGU UGUCCC CG GUCCG<br>A A-- U - U         | -33                    |
| ath-miR162a-3p | 1617                    | C GUC CUUAGG G<br>CUGGA CGGAG GUCGA<br>      :     :   <br>GACCU GUCUC UAGCU<br>- AC CAAA-- -               | -23.2                  |

|                |      |                                                                                                                                                                |
|----------------|------|----------------------------------------------------------------------------------------------------------------------------------------------------------------|
| ath-miR166a-3p | 4798 | G GG GG AA UU U<br>GGGGG G G UGGU GG<br>    :           : <span style="float: right;">-29.9</span><br>CCCC C C ACCA CU<br>- UA UU GG GG -                      |
| osa-miR166g-3p | 4798 | G GG GG AA UU U<br>GGGGG G G UGGU GG<br> : :           : <span style="float: right;">-26.9</span><br>CUCCU C C ACCA CU<br>- UA UU GG GG -                      |
| ath-miR167a-5p | 240  | -C - GAG G U<br>GAUCG GC GG AGCUUC<br>    :             <span style="float: right;">-26.8</span><br>CUAGU CG CC UCGAAG<br>AU A A-- G U                         |
| ath-miR168a-5p | 896  | G G CCCCCUU CUCCAGG G<br>UC CCGGCCUGC CCG AGCGA<br>      :        :       <span style="float: right;">-31.3</span><br>AG GGCUGGACG GGU UCGCU<br>A - U----- - - |
| ath-miR172a    | 1857 | -C A CG G<br>GCA UGUC CGGGAUUC<br>    :    ::    <span style="float: right;">-23.5</span><br>CGU GUAG GUUCUAAG<br>UA C UA A                                    |
| ath-miR172c    | 1857 | -C A CG G<br>GCA UGUC CGGGAUUC<br>    :    ::    <span style="float: right;">-23.5</span><br>CGU GUAG GUUCUAAG<br>GA C UA A                                    |
| ath-miR390a-5p | 993  | U AG G CAGUC G<br>GGCG AUCCUC U GGCU<br>             :    <span style="float: right;">-27.3</span><br>CCGC UAGGGAG A UCGA<br>- GA G C---- A                    |
| ath-miR397a    | 1010 | A U G G-- <span style="float: right;">-24.6</span><br>GUCGGC GCU GUGCUCGA                                                                                      |



|               |      |  |                                                                                                                   |       |
|---------------|------|--|-------------------------------------------------------------------------------------------------------------------|-------|
|               |      |  | :  ::       ::      <br>UAGUUG CGA CGUGAGUU<br>G - - ACU                                                          |       |
| ath-miR403-3p | 2568 |  | A GAAAAUA U U<br>CGAG GCGUG AUCUGG<br>                  ::<br>GCUC CGCAC UAGAUU<br>- AAACA--- U -                 | -21.6 |
| osa-miR528-5p | 899  |  | -G GGC C-- C<br>CC CUGC CCCCUCG<br>                 :<br>GG GACG GGGGAAGGU<br>GA A-- UAC -                        | -29.2 |
| ath-miR824-5p | 1701 |  | A GAGGGA UUGG G G<br>UCCC UUCGCA AAUGGU UA<br>     :  :            <br>AGGG GAGUGU UUACCA AU<br>- AA---- ---- G - | -23.7 |
| ath-miR845a   | 1005 |  | U CGGCUGC C - A<br>CGUCAGU UGGUG UC GAGCC<br> :   :       :         <br>GUAGUUA ACCAU AG CUCGG<br>- ----- - U C   | -25.2 |

### Target gene of plant miRNAs: MKP3

| MIRNA          | Position in target gene | Structure of binding site                                                                           | minimum of free energy |
|----------------|-------------------------|-----------------------------------------------------------------------------------------------------|------------------------|
| ath-miR156a-5p | 186                     | -A UACU C G C<br>GCUC GCUCUCU C UGUU<br>     :            :<br>CGAG UGAGAGA G ACAG<br>CA ---- A - U | -22.9                  |
| ath-miR157a-5p | 193                     | C CC G G G G<br>UGCUCUCU GU UUC GU GA<br>        :          :  <br>ACGAGAGA UA AAG CA UU            | -24.3                  |

|                |      |         |           |            |      |      |   |       |
|----------------|------|---------|-----------|------------|------|------|---|-------|
|                |      | C       | --        | G          | A    | G    | - |       |
| ath-miR160a-5p | 47   | G       | C         | CA         | CU   | AGA  | C | -27.3 |
|                |      | UGGC    | UGCAG     | GG         | GGCU | AGGC |   |       |
|                |      |         | :         |            | :  : |      |   |       |
|                |      | ACCG    | AUGUC     | CC         | UCGG | UCCG |   |       |
|                |      | -       | U         | --         | --   | ---  | U |       |
| ath-miR162a-3p | 1679 | -----A  |           | GACAUUUG   |      | U    |   | -20.6 |
|                |      | GUAGAGG |           | UAUUGA     |      |      |   |       |
|                |      | :       |           | :          |      |      |   |       |
|                |      | CGUCUCC |           | AUAGCU     |      |      |   |       |
|                |      | GACCUA  |           | AA-----    |      | -    |   |       |
| ath-miR166a-3p | 2250 | A       | UGC       | UUCACU     |      | -    | A | -27.1 |
|                |      | GGGAG   | UGG       | GUCUGG     | CCGG |      |   |       |
|                |      | :       | :         | :          | :    |      |   |       |
|                |      | CCCUU   | ACU       | CGGACC     | GGCU |      |   |       |
|                |      | C       | ---       | U-----     |      | A    | - |       |
| osa-miR166g-3p | 2250 | A       | UGC       | UUCACU     |      | -    | A | -25.3 |
|                |      | GGGAG   | UGG       | GUCUGG     | CCGG |      |   |       |
|                |      | :   :   | :         | :          | :    |      |   |       |
|                |      | UCCUU   | ACU       | CGGACC     | GGCU |      |   |       |
|                |      | C       | ---       | U-----     |      | A    | - |       |
| ath-miR167a-5p | 802  | G       | -         | AGC        |      | GC   | G | -26.9 |
|                |      | AGA     | CG        | UGCUGGCAGU | CA   |      |   |       |
|                |      |         | :         | :          |      |      |   |       |
|                |      | UCU     | GU        | ACGACCGUCG | GU   |      |   |       |
|                |      | A       | A         | ---        |      | AA   | - |       |
| ath-miR168a-5p | 45   | -G      | G         |            | G    | U-   |   | -30.5 |
|                |      | U       | UGGCCUGCA | CAGGC      |      |      |   |       |
|                |      | :       | : :       | :          |      |      |   |       |
|                |      | G       | GCUGGACGU | GUUCG      |      |      |   |       |
|                |      | AA      | G         |            | G    | CU   |   |       |
| ath-miR172a    | 1719 | C       | G         | -          |      | G--  |   | -24.1 |
|                |      | UGCAG   | A         | CAUCAGGGU  |      |      |   |       |
|                |      |         |           | :          | :    |      |   |       |
|                |      | ACGUC   | U         | GUAGUCUA   |      |      |   |       |
|                |      | U       | G         | A          |      | AGA  |   |       |

|                |      |                                                                                                                   |       |
|----------------|------|-------------------------------------------------------------------------------------------------------------------|-------|
| ath-miR172c    | 1718 | <p>C G - G--<br/> CUGCAG A CAUCAGGGU<br/>             : :<br/> GACGUC U GUAGUUCUA<br/> - G A AGA</p>              | -25.8 |
| ath-miR390a-5p | 2641 | <p>-----G A UAU G<br/> GUCCCUCCU G GCU<br/> :            <br/> UAGGGAGGA C CGA<br/> CCGCGA - U-- A</p>            | -25.3 |
| ath-miR397a    | 427  | <p>--A A CUCUGUG A<br/> UAACGC GCAU UUAGUGA<br/> :      :  : <br/> GUUGCG CGUG AGUUACU<br/> GUA A ----- -</p>     | -22.5 |
| ath-miR403-3p  | 1830 | <p>C G--- GG U<br/> CGAGU GUGUGAA UAG<br/>       :      :<br/> GCUCA CGCACUU AUU<br/> - AACAA AG -</p>            | -21.2 |
| osa-miR528-5p  | 2645 | <p>C A- G--- U<br/> CUCCU GUAUGCU CCA<br/>       :    :   <br/> GAGGA CGUACGG GGU<br/> - GA GGAA -</p>            | -24.3 |
| ath-miR824-5p  | 1465 | <p>A AAGA C C-<br/> CU UCA CAGAUGGUC<br/>  :      :    <br/> GG AGU GUUUACCAG<br/> A GAAG - AU</p>                | -21.2 |
| ath-miR845a    | 1694 | <p>G ACUCUA U U<br/> UAUUGAUUGGUG CAGA CC<br/> : : :     :       <br/> GUAGUUAACCAU GUCU GG<br/> - A----- C C</p> | -21.1 |

### Target gene of plant miRNAs: PIK3

| MIRNA          | Position in target gene | Structure of binding site                                                                                                                                   | minimum of free energy |
|----------------|-------------------------|-------------------------------------------------------------------------------------------------------------------------------------------------------------|------------------------|
| ath-miR167a-5p | 346                     | <pre> --U  GUA  A-    A       AUCG GC GCAGCUUCA          :                      UAGU  CG CGUCGAAGU       AUC  A-- AC    -           </pre>                  | -23.8                  |
| ath-miR172a    | 1108                    | <pre> C    GU    CCA    C       UGCAG UAUCAUU GAGAUUUU             :     :       :        ACGUC GUAGUAG UUCUAAGA       U    --    ---    -           </pre> | -23.2                  |
| ath-miR390a-5p | 4859                    | <pre> --A  C    A  A-       GCU UUCUCC GAGC             :               CGA AGGGAGG CUCG       CCG  U    A  AA           </pre>                             | -26.3                  |
| ath-miR397a    | 2521                    | <pre> U  A  A  UG  U-       CGU AACGC UGU UCAAU        :        :           GUA UUGCG ACG AGUUA       -  G  -  UG  CU           </pre>                      | -22.8                  |
| osa-miR528-5p  | 1659                    | <pre> U  AG  --  A  -  C       CUCC CUGCA CC CCU CCA                                  GAGG GACGU GG GGA GGU       -  A-  AC  -  A  -           </pre>       | -26.5                  |
| ath-miR824-5p  | 5498                    | <pre> G    AUUA  C  A---       UCUCUUC  UACA GUGG        :      :    :          AGGGAAG  GUGU UACC       -    A---  U  AGAU           </pre>                | -20.2                  |
| ath-miR845a    | 5244                    | <pre> --C  G    C  G           </pre>                                                                                                                       | -24.4                  |

CAA UGGUAAUAG GUCG  
 ||| |||||:| |:  
 GUU ACCAUAGUC CGGC  
 GUA A U -

**Target gene of plant miRNAs: PI3K**

| MIRNA          | Position in target gene | Structure of binding site                                                                                    | minimum of free energy |
|----------------|-------------------------|--------------------------------------------------------------------------------------------------------------|------------------------|
| ath-miR156a-5p | 5375                    | -G GUCGGA A<br>GCUCAUUUUU UCUGUCA<br>     : :       <br>CGAGUGAGAG AGACAGU<br>CA A----- -                    | -27                    |
| ath-miR157a-5p | 1722                    | -C CUAUCUC U-<br>GCUCUCUAUCU UCUGUC<br>           <br>CGAGAGAUAGA AGACAG<br>CA ----- UU                      | -31.2                  |
| ath-miR158a-3p | 6549                    | U GG AUCUG ACG A<br>UGUU GUC GCGU GGGA<br> :      : :      <br>ACGA CAG UGUA CCCU<br>- AA A---- AA- -        | -20.9                  |
| ath-miR160a-5p | 4738                    | G - UCCGU CC A<br>UGGCA GCGGG GGCCA GGCA<br>      :    :        <br>ACCGU UGUCC UCGGU CCGU<br>- A C---- -- - | -31                    |
| ath-miR162a-3p | 3233                    | -A C A GC- G<br>G GAUG AGGGG GUCGA<br>        :    :   <br>C CUAC UCUC UAGCU<br>GA - G AAA -                 | -22.6                  |

|                |      |                                                                                                                                    |       |
|----------------|------|------------------------------------------------------------------------------------------------------------------------------------|-------|
| ath-miR166a-3p | 530  | <pre> A   AGAAAU   A   C A-    GGGAA   UGAAG CUUGG CC                   :       CCCUU   ACUUC GGACC GG C   -----   -   A CU </pre> | -27.4 |
| osa-miR166g-3p | 3368 | <pre> G   ACGA   CG--   A    GAGGAU   GAAGCU   CCGA                 :       CUCCUUA   CUUCGG   GGCU -   -----   ACCA   - </pre>    | -26.2 |
| ath-miR167a-5p | 4729 | <pre> -C   U G   GGG C    GAUCG UG UGGCAGC   UC       :                  CUAGU AC ACCGUCG   AG AU   - G   A-- U </pre>             | -28.3 |
| ath-miR168a-5p | 4623 | <pre> A UU   - G    UC GGCUUGCAUCGAG GA        : :    : :        AG CUGGACGUGGUUC CU A GG   G - </pre>                             | -32.3 |
| ath-miR172a    | 6910 | <pre> C   A A-    UGCGGCGUUAUCGA GUU       : : : : :  :      ACGUCGUAGUAGUU UAA U   C GA </pre>                                    | -26.1 |
| ath-miR172c    | 6909 | <pre> C   A A-    CUGCGGCGUUAUCGA GUU        : : : : :  :      GACGUCGUAGUAGUU UAA -   C GA </pre>                                 | -27.8 |
| ath-miR390a-5p | 927  | <pre> U   AC-   A-    GCGCUGUUUCU   GAGU         : :     :    CGCGAUAGGGA   CUCG C   GGA   AA </pre>                               | -26.2 |
| ath-miR397a    | 3196 | <pre> A   UG   G G UU   C    GUCG   GCUG A UU   GAUGA </pre>                                                                       | -24.6 |

|               |      |  |                                                                                                                    |       |
|---------------|------|--|--------------------------------------------------------------------------------------------------------------------|-------|
|               |      |  | :  :        : :                                                                                                    |       |
|               |      |  | UAGU CGAC U AG UUACU                                                                                               |       |
|               |      |  | G UG G G -- -                                                                                                      |       |
| ath-miR403-3p | 2931 |  | A CGAACG - G--<br>GAGU GUG GUGAAUC<br>              <br>CUCA CAC CACUUAG<br>G AA---- G AUU                         | -22.3 |
| osa-miR528-5p | 4333 |  | G CAGAG C G G C<br>UCCUC UG CAUGC U CUUCCA<br>               :      <br>AGGAG AC GUACG G GAAGGU<br>G ----- - - G - | -28.2 |
| ath-miR824-5p | 9317 |  | C UUCUC A C-<br>CCUUUCACGA GUG UC<br>  :       :  :    <br>GGGAAGAGUGUU UAC AG<br>A ----- C AU                     | -24   |
| ath-miR827    | 6547 |  | -C -- G<br>UUUGUUG GGUCAUCUG<br>           : <br>AAACAAC CCAGUAGAU<br>UC UA U                                      | -24.5 |
| ath-miR845a   | 7744 |  | -U A A-<br>UCGAUUGGUA UCAGGGU<br>  :           : <br>AGUUAACCAU AGUCUCG<br>GU - GC                                 | -27.9 |
